# Supplementary material
Source: Springer Nature journal article supplement (https://www.springermedizin.de/resource/supplementary/12884_2009_265_MOESM6_ESM.pdf/9457350)

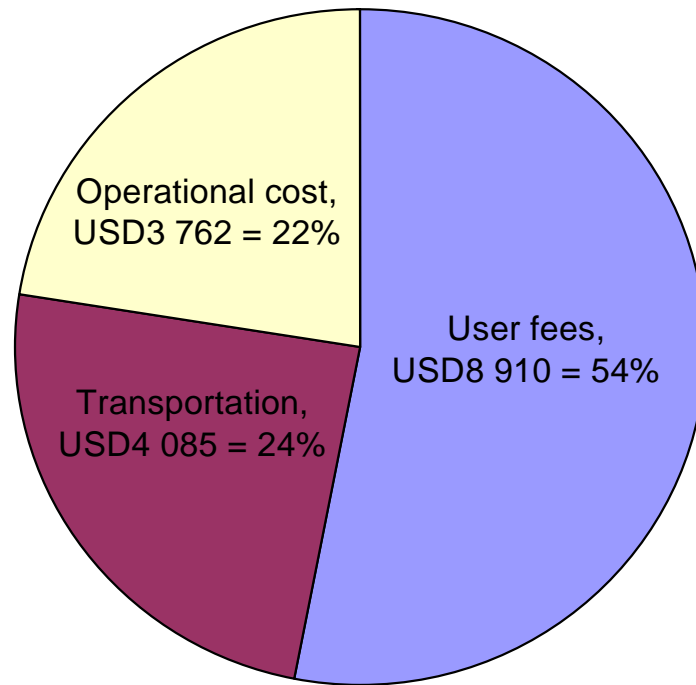

Supplement: MOESM6 [file 9457350]
